# Supplementary material
Source: Springer Nature journal article supplement (https://www.springermedizin.de/resource/supplementary/12957_2012_1260_MOESM2_ESM.pdf/9562872)

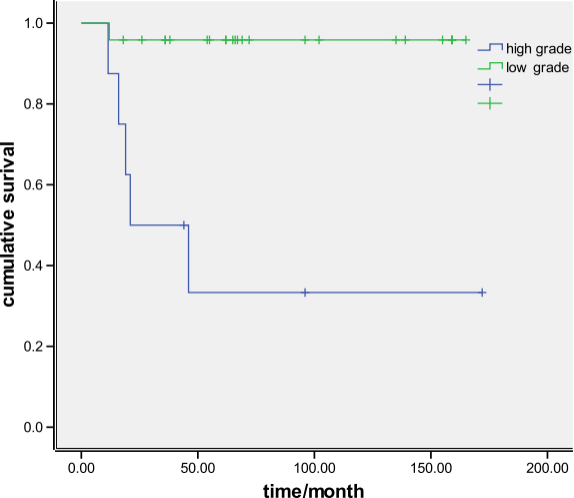

Supplement: MOESM2 [file 9562872]
